# Supplementary material
Source: Springer Nature journal article supplement (https://www.springermedizin.de/resource/supplementary/12885_2013_4535_MOESM2_ESM.pdf/9466584)

# HER2 AQUA score vs ER status

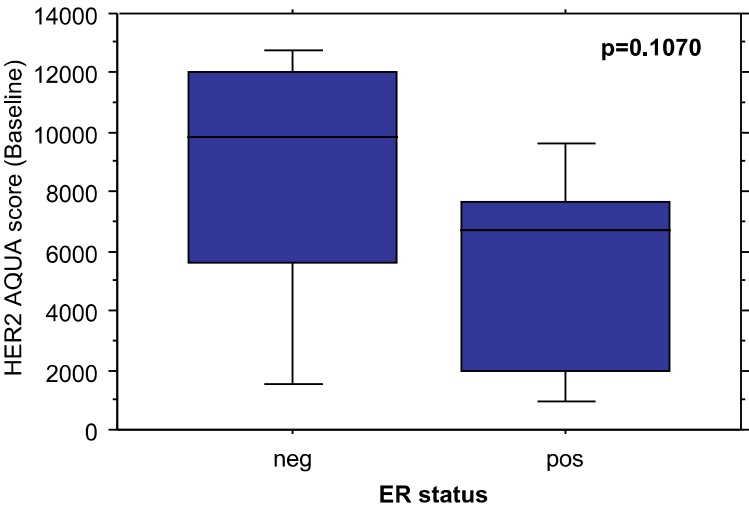

Supplement: MOESM2 [file 9466584]
